# Supplementary material
Source: PubMed Central journal article supplement (PMC6431580)
Supplement: NIHMS1516136-supplement-1.pdf [file NIHMS1516136-supplement-1.pdf]

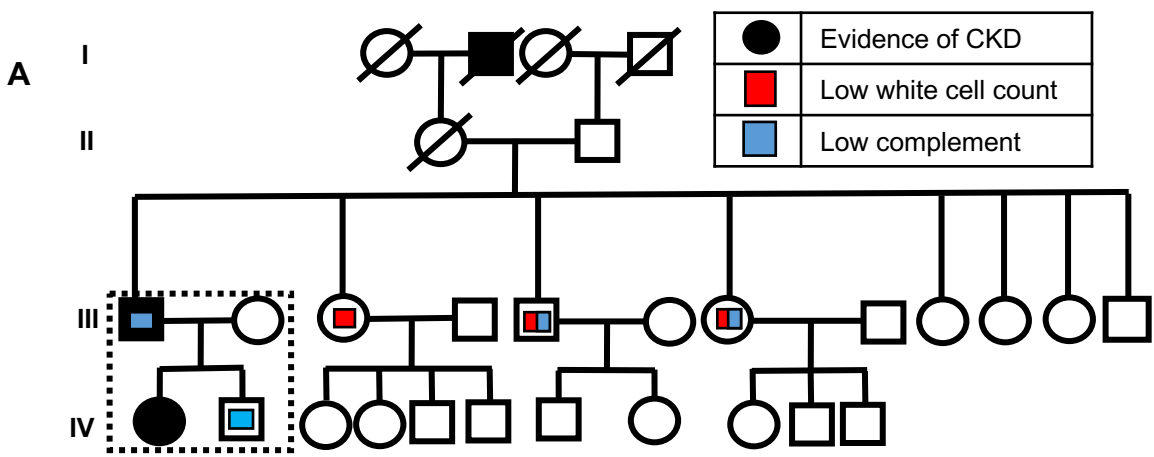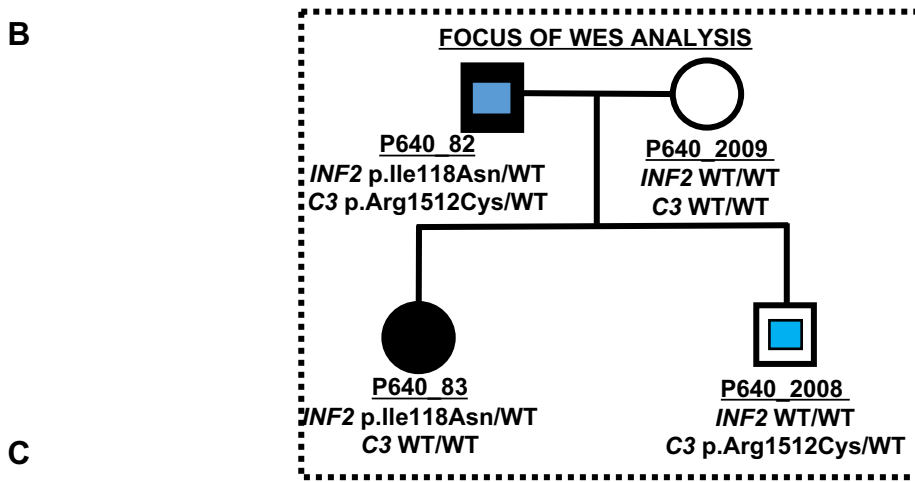

**C**

| ID        | Gene        | c. change | Exon  | Zygoty | p.Change     | Conservation           | Poly 2 | SIFT | Mut Taster | EVS | gnomAD         |
|-----------|-------------|-----------|-------|--------|--------------|------------------------|--------|------|------------|-----|----------------|
| P640_82   | <i>INF2</i> | c.353T>A  | 2/23  | het    | p.Ile118Asn  | <i>D. melanogaster</i> | 0.998  | Del. | D.C.       | /   | /              |
| P640_83   | <i>INF2</i> | c.353T>A  | 2/23  | het    | p.Ile118Asn  | <i>D. melanogaster</i> | 0.998  | Del. | D.C.       | /   | /              |
| P640_82   | <i>C3</i>   | c.4534C>T | 37/41 | het    | p.Arg1512Cys | <i>X. tropicalis</i>   | 0.652  | Del. | D.C.       | /   | 0/2/<br>246248 |
| P640_2008 | <i>C3</i>   | c.4534C>T | 37/41 | het    | p.Arg1512Cys | <i>X. tropicalis</i>   | 0.652  | Del. | D.C.       | /   | 0/2/<br>246248 |

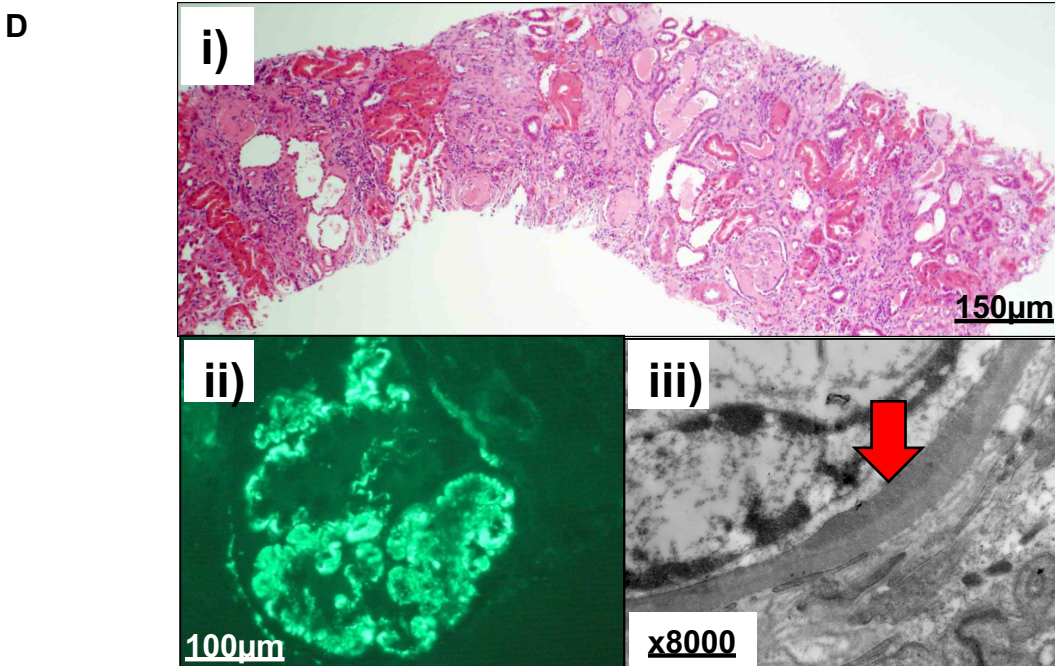

**Supplementary Figure S1. Genetic and clinical data on family P640**

**A. Extended family pedigree of family P640** Male are indicated by a square; female are indicated by a circle.

**B. Focus of whole exome sequencing analysis** - Four individuals were submitted for whole exome analysis

**C. Final evaluation table following WES analysis for family P640**

**D. Kidney biopsy of patient P640\_83**

- i) Light microscopy showing 3 sclerosed glomeruli, 1 partially sclerosed & 1 proliferative glomeruli
- ii) Direct immunofluorescence demonstrating a glomerulus with granular, mesangial C3 granular
- iii) Electron microscopy demonstrating loss of podocytes – red arrow demonstrates granular sub-endothelial dense deposits
