# Supplementary material
Source: PubMed Central journal article supplement (PMC6431580)
Supplement: NIHMS1516136-supplement-3.pdf [file NIHMS1516136-supplement-3.pdf]

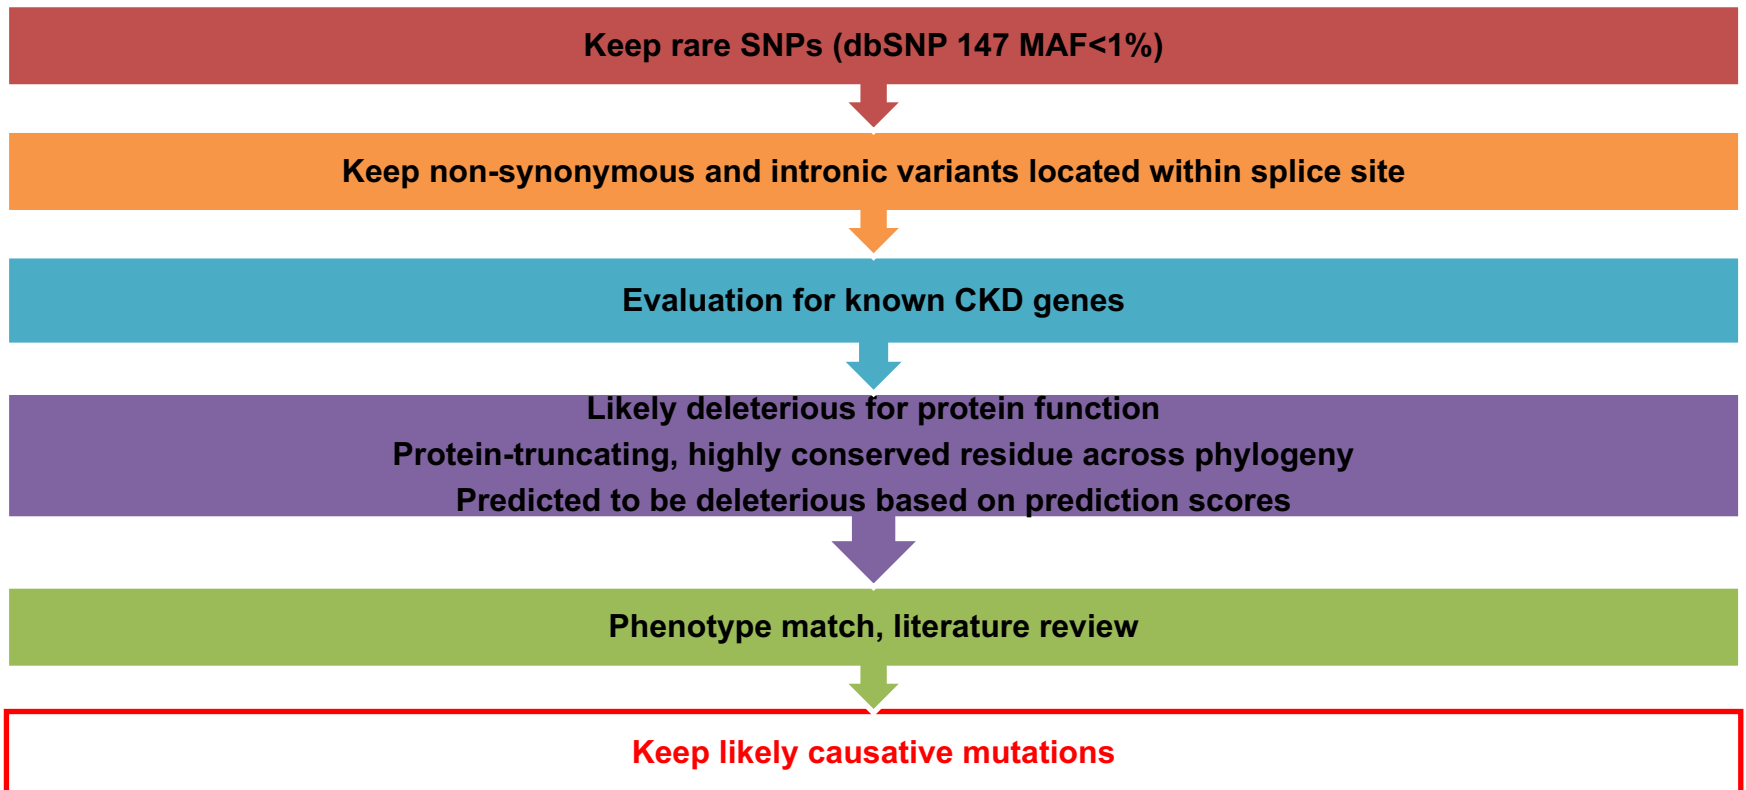

**Supplementary Figure S3. Variant filtering process for the identification of pathogenic mutations in genes known to cause chronic kidney disease (CKD)**

Schematic overview of the workflow used for filtering of WES data.

- i. Keep rare variants present with a minor allele frequency (MAF) <1% in healthy control cohorts **dbSNP147** (<https://www.ncbi.nlm.nih.gov/projects/SNP>).
- ii. Keep non-synonymous variants and intronic variants that are located within splice sites.
- iii. Applying known gene approach by selecting all variants detected in known CKD genes (**Suppl. Table 6-13**).
- iv. Ranking of remaining variants based on their predicted likelihood to be deleterious for the function of the encoded protein using **Polyphen 2** (<http://genetics.bwh.harvard.edu/pph2>), **SIFT** (<http://sift.jcvi.org/>) and **Mutation Taster** (<http://www.mutationtaster.org>).
- v. Reviewing literature and review with referring physician delineating whether the detected mutation matches the phenotype.
- vi. Cross reference with the ACMG guidelines to determine if pathogenic, likely pathogenic or a variant of uncertain significance.
